# Supplementary material for: Physical Activity Trajectories among Persons of Turkish Descent Living in Germany—A Cohort Study
Source: MDPI journal article supplement (doi:10.3390/ijerph17176349), 2020-08-31
Supplement: s1 [file s1]

**Supplementary Table 1.** Weekly activity levels of PA trajectories and of the total sample (n=197, complete PA data for baseline and follow-up)

| Weekly activity level         | Total<br>N=197 |           | Inactive<br>n=52 (23.7%) |           | Decreasing<br>N=24 (12.2%) |           | Increasing<br>N=83 (42.1%) |           | Stable active<br>n=38 (19.3%) |           |
|-------------------------------|----------------|-----------|--------------------------|-----------|----------------------------|-----------|----------------------------|-----------|-------------------------------|-----------|
|                               | baseline       | follow-up | baseline                 | follow-up | baseline                   | follow-up | baseline                   | follow-up | baseline                      | follow-up |
| Inactive (no activity at all) | 57.4           | 34.0      | 100                      | 100       | 0                          | 62.5      | 73.5                       | 0         | 0                             | 0         |
| Light (<150min/week)          | 30.5           | 41.1      | 0                        | 0         | 50.0                       | 37.5      | 19.3                       | 48.2      | 84.2                          | 84.2      |
| Moderate (150- <300min/week)  | 7.6            | 12.2      | 0                        | 0         | 29.2                       | 0         | 7.2                        | 26.5      | 5.3                           | 5.3       |
| High ( $\geq$ 300min/week)    | 4.6            | 12.7      | 0                        | 0         | 20.8                       | 0         | 0                          | 25.3      | 10.5                          | 10.5      |
